# Supplementary material for: Cancer-cell-biomimetic nanoparticles systemically eliminate hypoxia tumors by synergistic chemotherapy and checkpoint blockade immunotherapy
Source: PubMed Central journal article supplement — Acta Pharm Sin B. 2021 Oct 22;12(4):2103–19. doi: 10.1016/j.apsb.2021.10.010 (PMC9279713; doi:10.1016/j.apsb.2021.10.010), 2021-10-22
Supplement: mmc1.pdf [file mmc1.pdf]

**Supporting Information for**

**ORIGINAL ARTICLE**

**Cancer-cell-biomimetic nanoparticles systemically eliminate hypoxia tumors by synergistic chemotherapy and checkpoint blockade immunotherapy**

Yongrong Yao, Huachao Chen\*, Ninghua Tan\*

*State Key Laboratory of Natural Medicines, School of Traditional Chinese Pharmacy, China Pharmaceutical University, Nanjing 211198, China*

Received 11 July 2021; received in revised form 27 September 2021; accepted 4 October 2021

\*Corresponding authors. Tel.: +86 21 86185772 (Ninghua Tan); +86 21 86185772 (Huachao Chen).

E-mail addresses: nhtan@cpu.edu.cn (Ninghua Tan), huachao.chen@cpu.edu.cn (Huachao Chen).

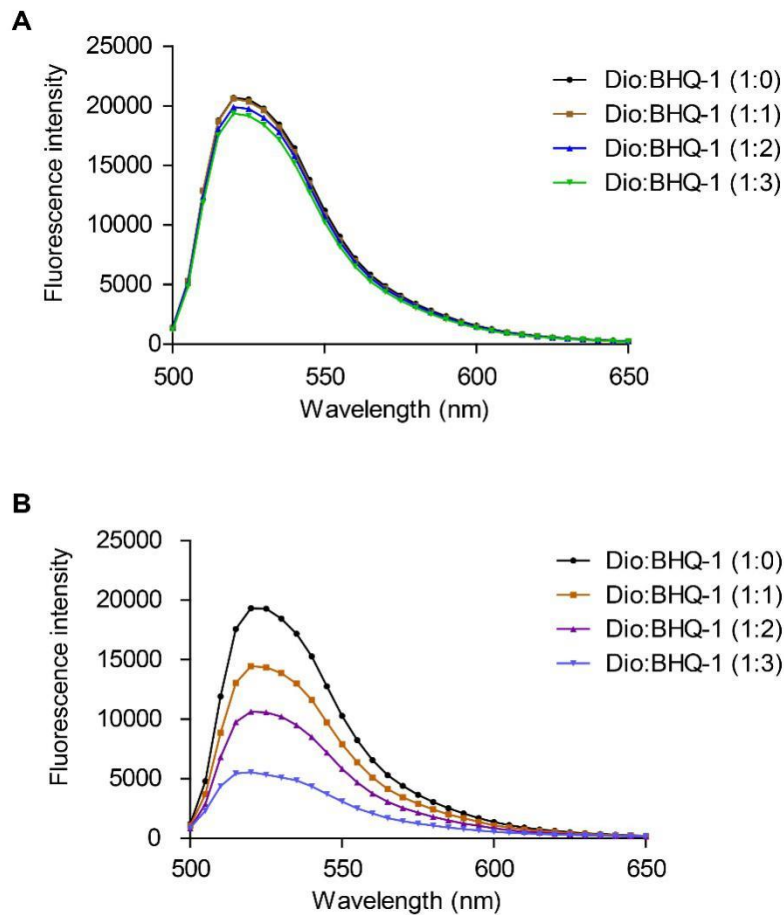

**Figure S1** Investigation of fluorescence resonance energy transfer (FRET) in BMS/RA@CC-Liposome. (A) The changes of fluorescence intensity of BMS/RA@CC-Liposome (Dio labelled membrane, BHQ-1 doped in shells of liposome), along with increasing proportions of BHQ-1; (B) The changes of fluorescence intensity of BMS/RA@CC-Liposome (Dio and BHQ-1 both doped in shells of liposome), along with increasing proportions of BHQ-1.

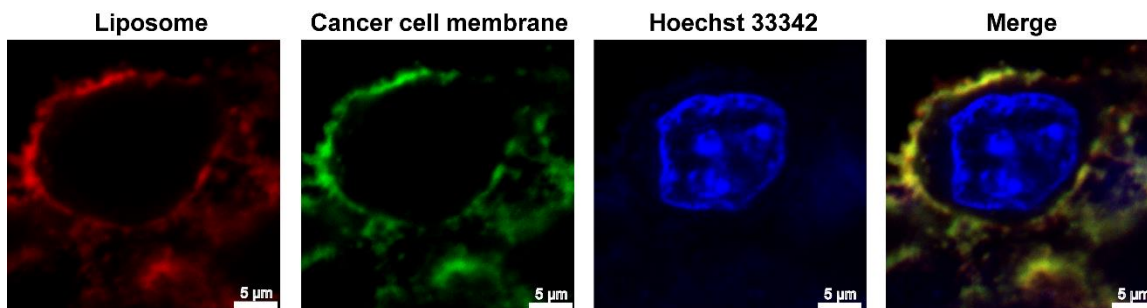

**Figure S2** Colocalization of liposome and cancer cell membrane upon cellular uptake.

BMS/RA@CC-Liposome was synthesized with liposome loaded with Cy5.5 (red channel) and cancer cell membrane labeled with Dio (green channel). Scale bar=5  $\mu\text{m}$ .

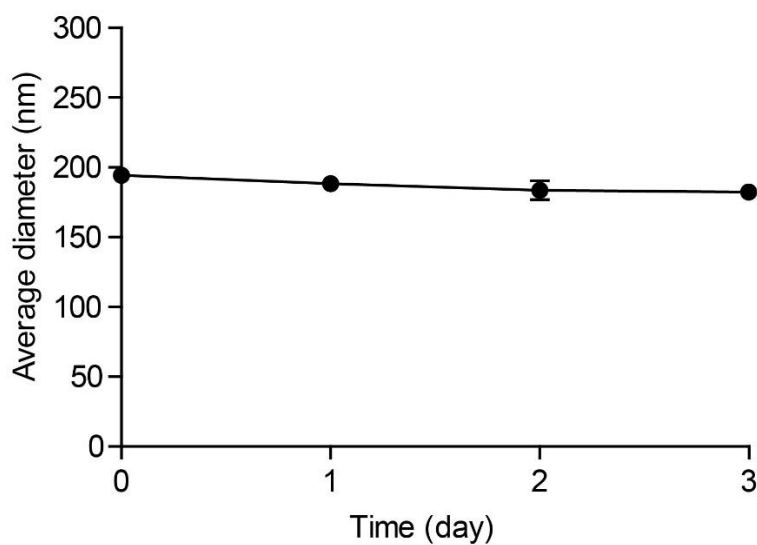

**Figure S3** The stability of BMS/RA@CC-Liposome. The stability study of BMS/RA@CC-Liposome was evaluated at 37  $^{\circ}\text{C}$  during three days. Data are given as mean  $\pm$ SD ( $n=3$ ).

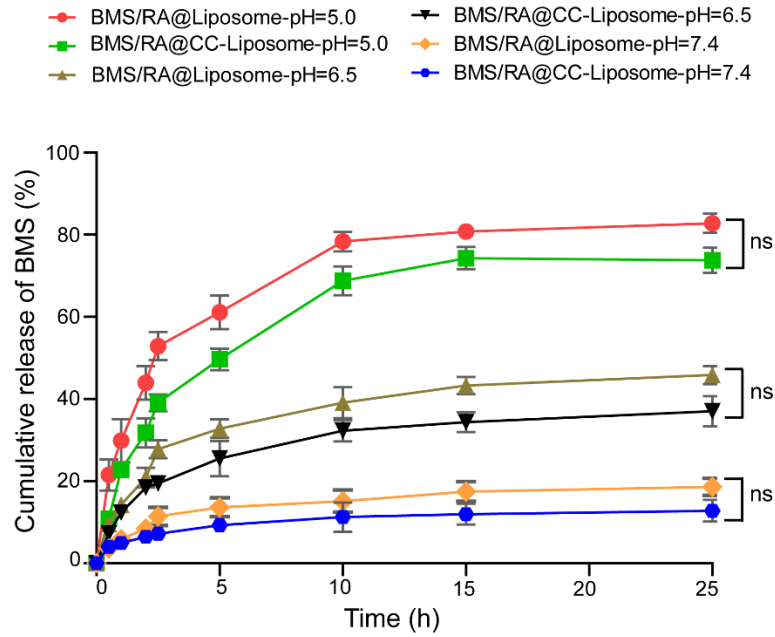

**Figure S4** *In vitro* release profiles of BMS. The release profiles of BMS of BMS/RA@Liposome and BMS/RA@CC-Liposome were performed at pH 5.0, 6.5 and 7.4. Data are given as mean $\pm$ SD ( $n=3$ ). ns, not significant.

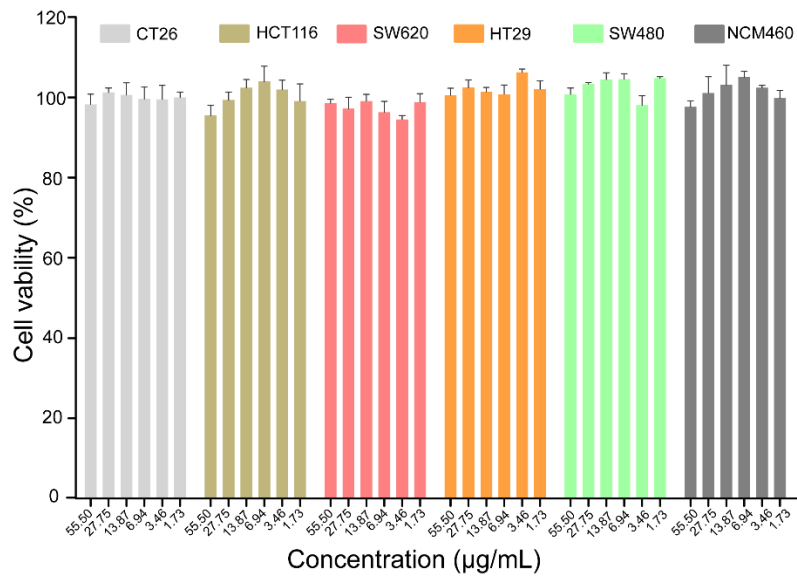

**Figure S5** SRB assay of different colon cancer cells and normal cells after CC-Liposome treatment. CT26, HCT116, SW620, HT29, SW480 and NCM460 cells in the presence of a series of

CC-Liposome (at doses of 55.5, 27.75, 13.87, 6.94, 3.46, and 1.73  $\mu\text{g}/\text{mL}$  cancer cell membrane) concentrations for 48 h incubation. Data are given as mean  $\pm$ SD ( $n=3$ ).

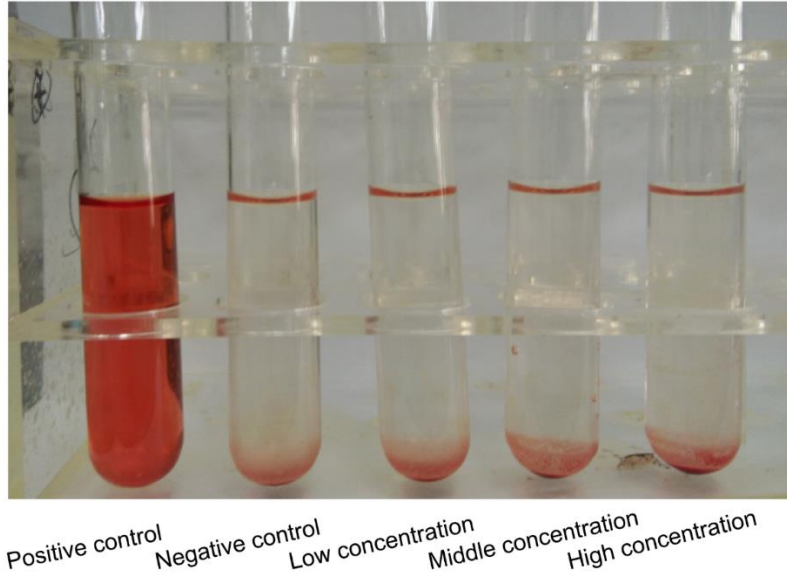

| Low concentration<br>(13.87 $\mu\text{g}/\text{mL}$ ) | Middle concentration<br>(27.75 $\mu\text{g}/\text{mL}$ ) | High concentration<br>(55.50 $\mu\text{g}/\text{mL}$ ) |
|-------------------------------------------------------|----------------------------------------------------------|--------------------------------------------------------|
| -0.007354969                                          | 9.19371E-05                                              | -0.001838742                                           |
| -0.007079158                                          | 9.19371E-05                                              | -0.001838742                                           |
| -0.007354969                                          | 9.19371E-05                                              | -0.002114554                                           |

**Figure S6** Hemolytic test of CC-Liposome with three concentrations in red blood cell of rabbit. The red blood cells of rabbit were added different concentrations of CC-Liposome, standing for 3 h at 37  $^{\circ}\text{C}$  before measuring. Data are given as mean  $\pm$ SD ( $n=3$ ).

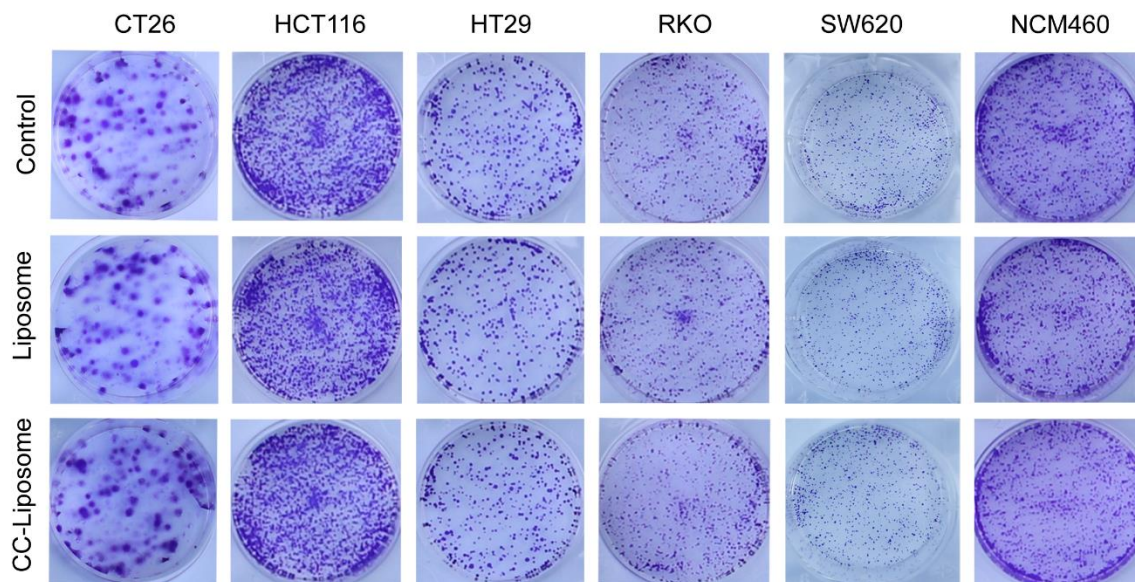

**Figure S7** The effect of CC-Liposome and Liposome on colony formation activity in different cells.

CT26, HCT116, HT29, RKO, SW620 and NCM460 cells in the presence of Liposome and CC-Liposome for 48 h incubation.

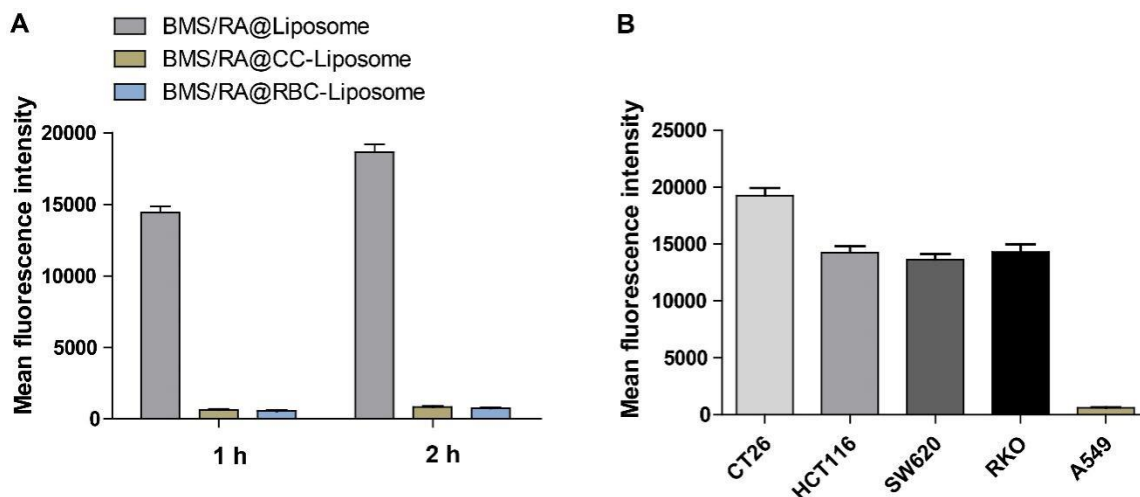

**Figure S8** Quantification of flow cytometry analysis. (A) Quantitative flow cytometry analysis of intracellular uptake of BMS/RA@Liposome, BMS/RA@CC-Liposome and BMS/RA@RBC-Liposome in RAW264.7 cells after 1-2 h incubation. Data are given as mean  $\pm$ SD ( $n=3$ ). (B) Quantitative flow cytometry analysis of BMS/RA@CC-Liposome uptake with CT26, HCT116, SW620, RKO and A549 cells. Data are given as mean  $\pm$ SD ( $n=3$ ).

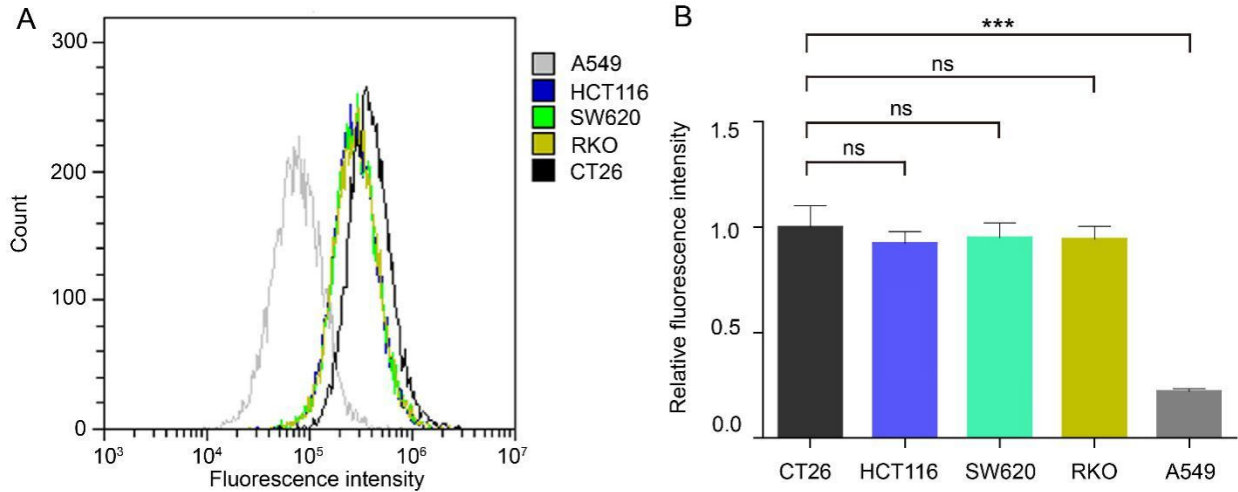

**Figure S9** Intracellular uptake of BMS/RA@CC-Liposome in CT26, HCT116, SW620, RKO and A549 cells after 2 h incubation. (A) Flow cytometer analysis of BMS/RA@CC-Liposome in CT26, HCT116, SW620, RKO and A549 cells; (B) Quantitative flow cytometry analysis of (A). Data are given as mean ± SD ( $n=3$ ). \*\*\* $P<0.001$ . ns, not significant.



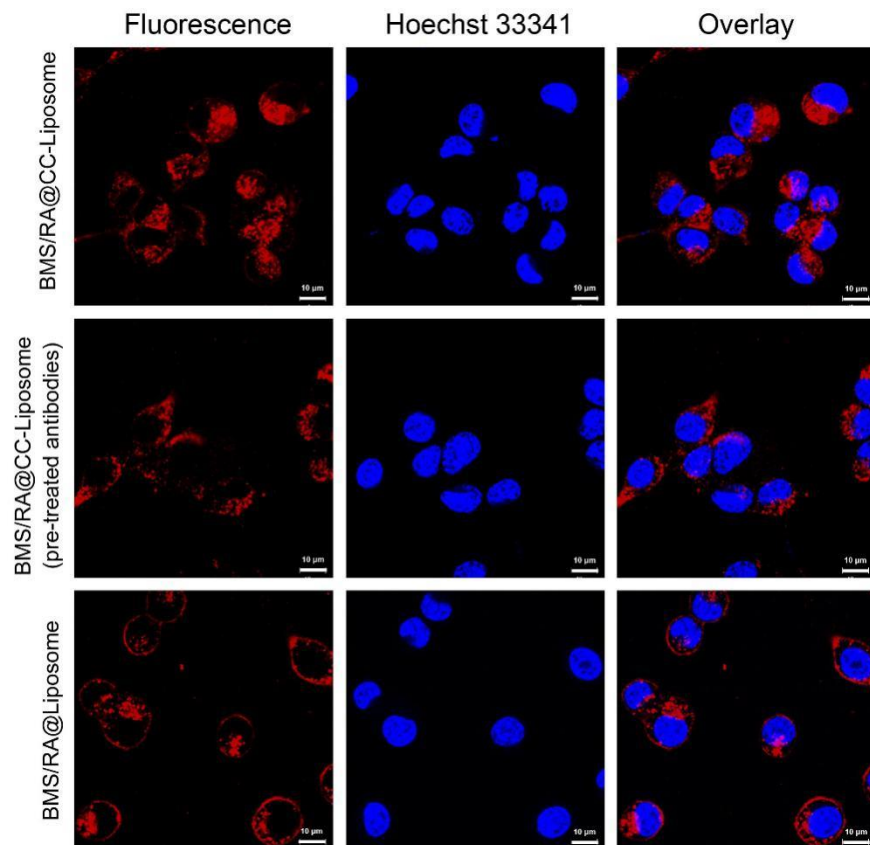

**Figure S10** Investigation of cellular uptake mechanism of BMS/RA@CC-Liposome. Confocal fluorescence imaging of CT26 cells incubated with the BMS/RA@CC-Liposome for 3 h; CT26 cells pretreated with excessive free TF-antigen antibody and E-cadherin antibody, followed by incubation with the BMS/RA@CC-Liposome for 3 h; CT26 cells incubated with BMS/RA@Liposome for 3 h.

Scale bars=10  $\mu$ m.

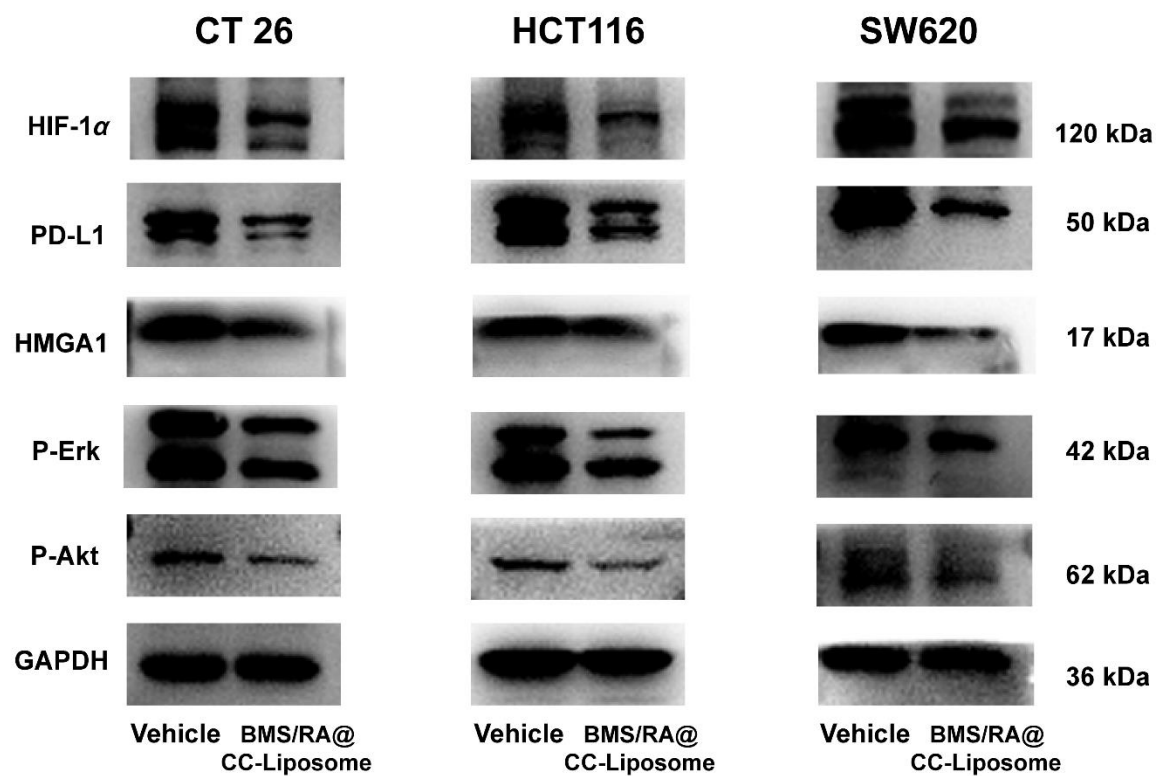

**Figure S11** Investigation of the effect of BMS/RA@CC-Liposome on the relative proteins expression in colon cancer cells. Western blotting analysis for the expression of HIF-1 $\alpha$ , PD-L1, HMGA1, P-Erk and P-Akt expression in CT26, HCT116 and SW620 cells after BMS/RA@CC-Liposome treatment (at dose of 100 nmol/L RA-V).

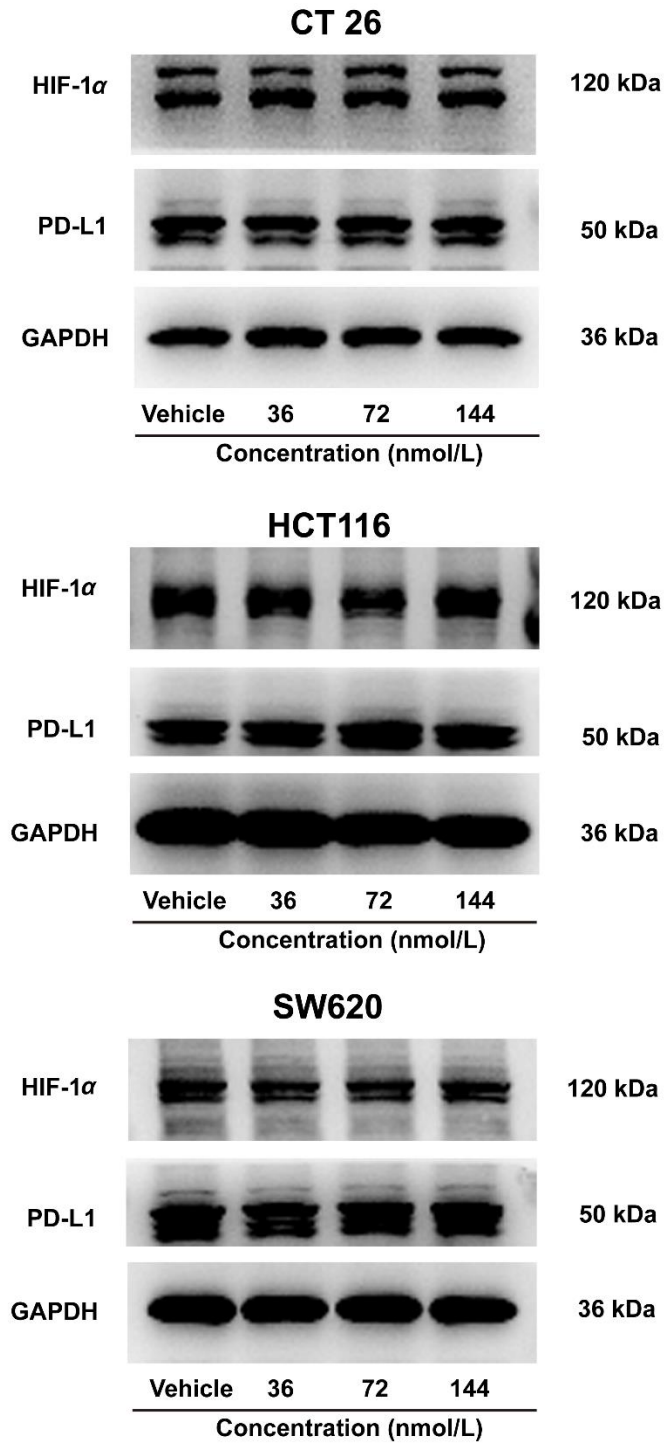

**Figure S12** Investigation of the effect of BMS on HIF-1 $\alpha$ , PD-L1 expression in colon cancer cells. Western blotting analysis for the expression of HIF-1 $\alpha$  and PD-L1 expression in CT26, HCT116 and SW620 cells after BMS treatment.

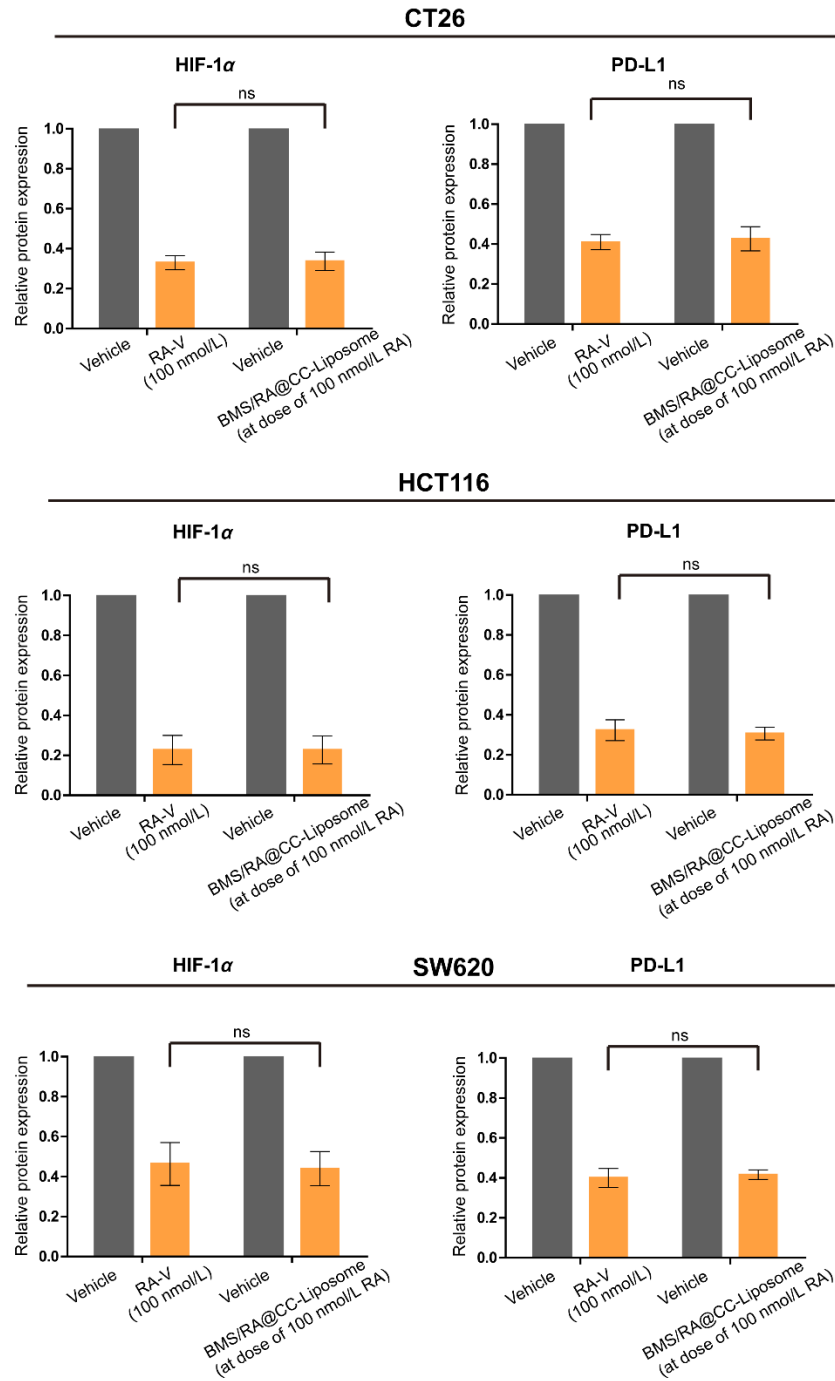

**Figure S13** Quantitative analysis of the expression of HIF-1 $\alpha$  and PD-L1. Quantitative analysis of the expression of HIF-1 $\alpha$  and PD-L1 at dose of 100 nmol/L RA-V treatment in Fig. 4A, 4D, 4E and BMS/RA@CC-Liposome treatment (at dose of 100 nmol/L RA-V) in Fig. S11 by optical densitometry using Image J. Data are given as mean  $\pm$ SD ( $n=3$ ). ns, not significant.

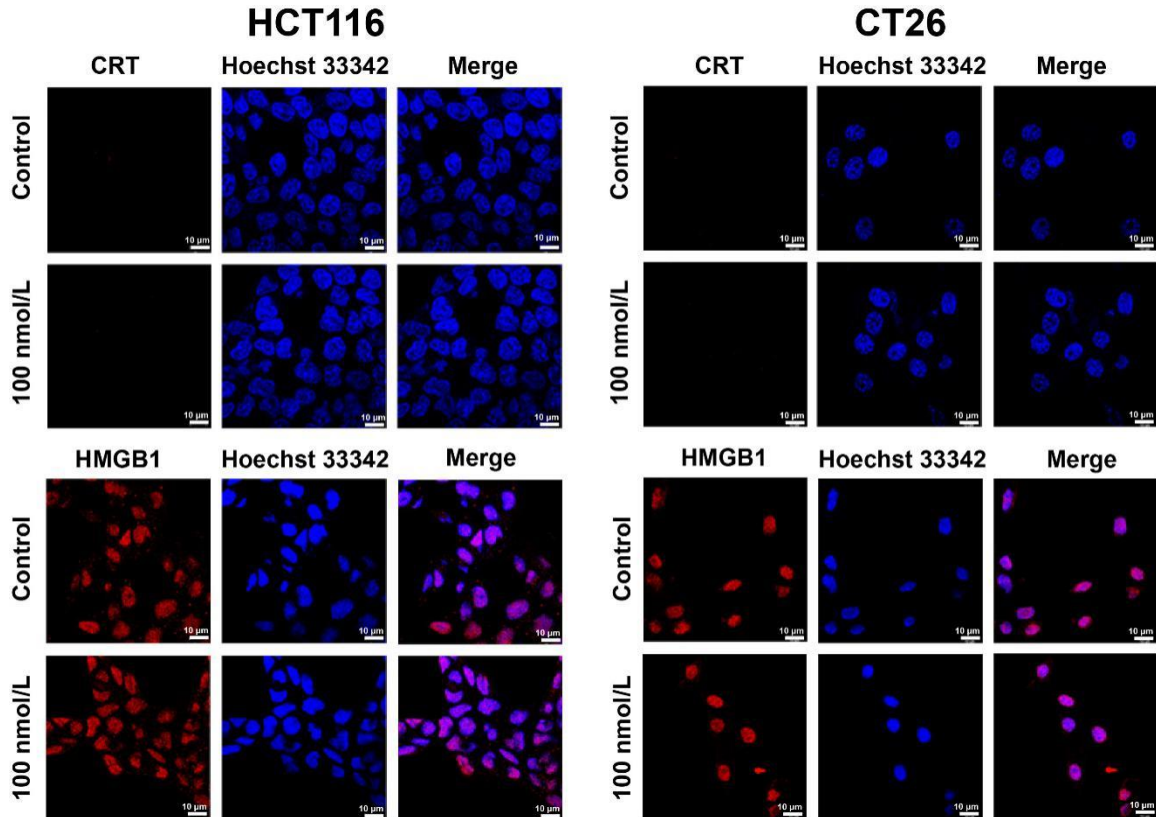

**Figure S14** Immunofluorescence assay of calreticulin (CRT) and high-mobility group box 1 (HMGB1). HCT116 and CT26 cells were treated with RA-V at dose of 100 nmol/L, then stained with CRT and HMGB 1, respectively. The nucleus was stained with Hoechst 33342 (blue). The CRT and HMGB1 proteins were labeled with Alexa 555 (red). Scale bar=10 μm.

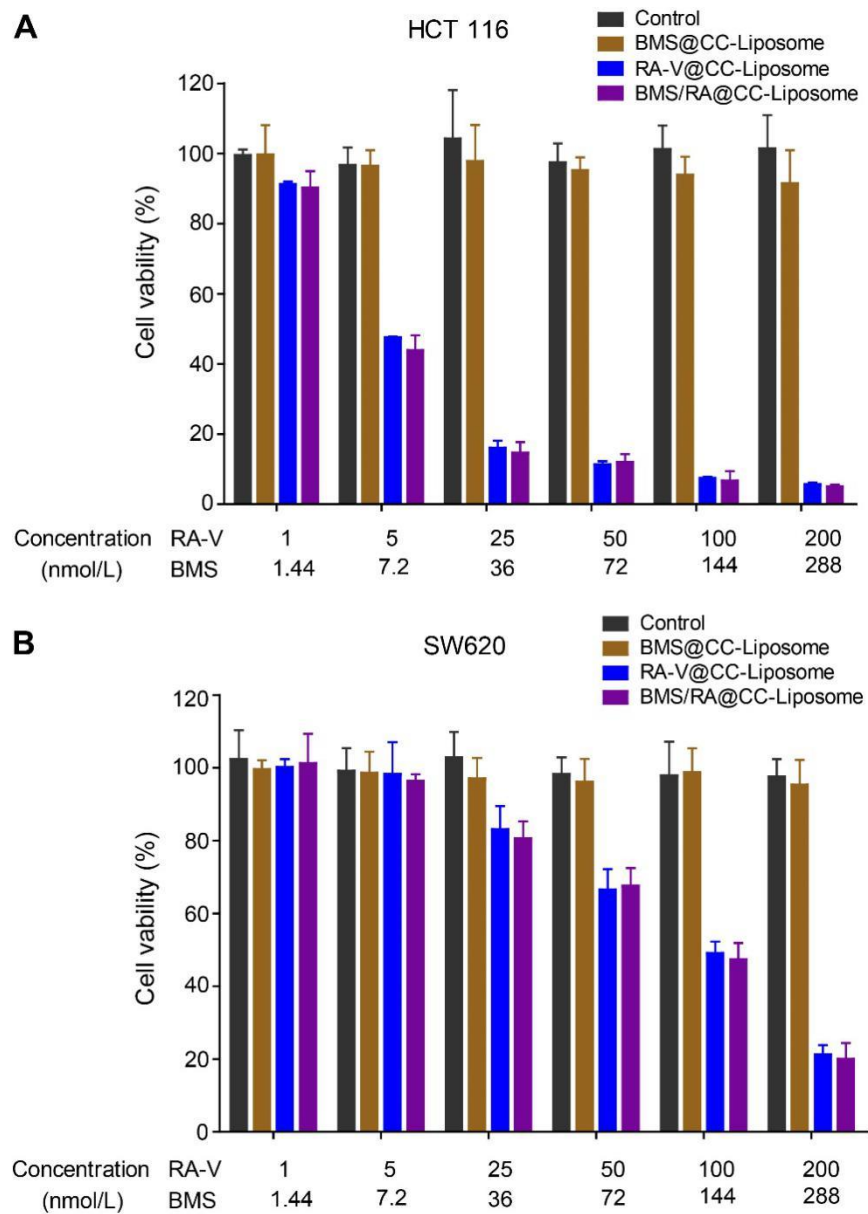

**Figure S15** SRB assay of HCT116 cells and SW620 cells after different treatments. (A) SRB assay of HCT116 in the presence of BMS@CC-Liposome, RA-V@CC-Liposome, and BMS/RA@CC-Liposome. Data are given as mean $\pm$ SD ( $n=3$ ). (B) SRB assay of SW620 cells in the presence of BMS@CC-Liposome, RA-V@CC-Liposome, and BMS/RA@CC-Liposome. Data are given as mean $\pm$ SD ( $n=3$ ).

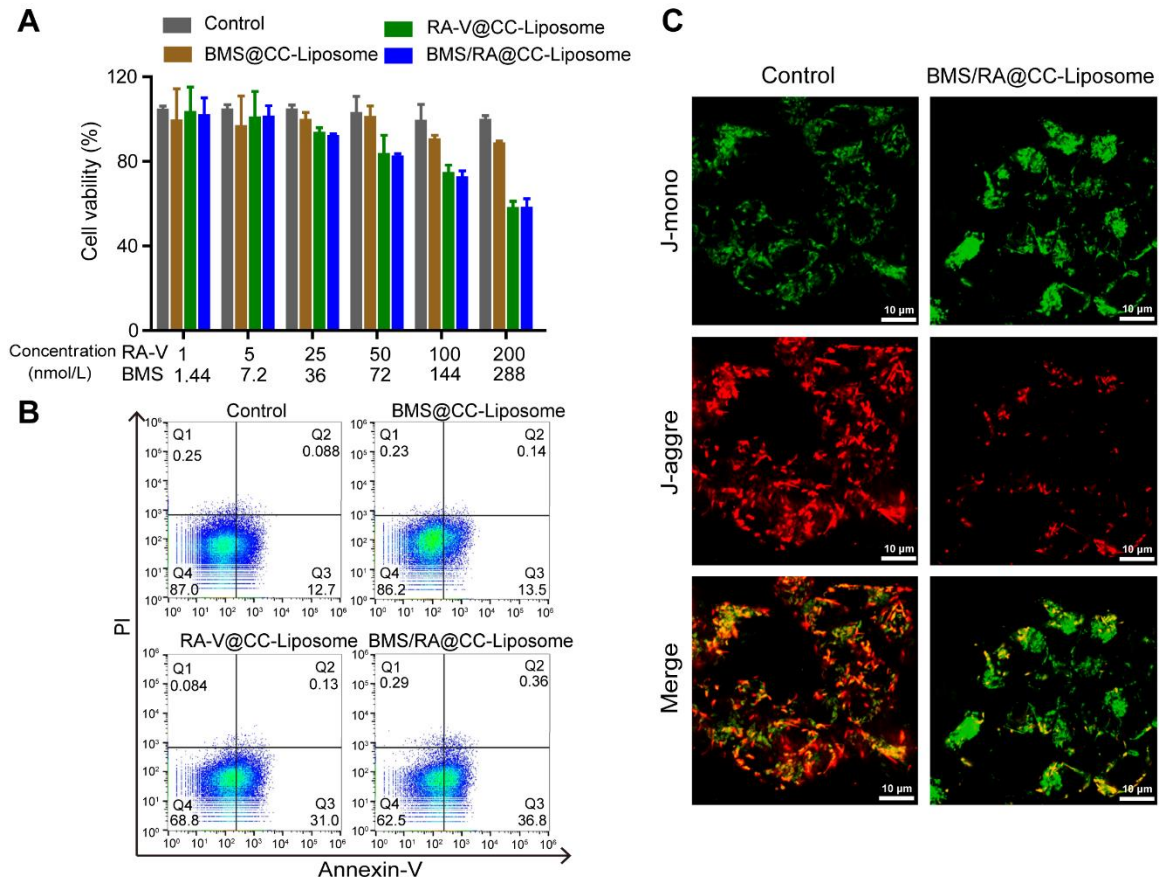

**Figure S16** Analysis of CT26 cell after different treatments. (A) SRB assay of CT26 cells in the presence of BMS@CC-Liposome, RA-V@CC-Liposome, and BMS/RA@CC-Liposome. Data are given as mean  $\pm$ SD ( $n=3$ ). (B) Flow cytometric analysis of CT26 cells death with different treatments; (C) Confocal fluorescence images in CT26 cells treated with PBS and BMS/RA@CC-Liposome. Scale bars=10  $\mu$ m.

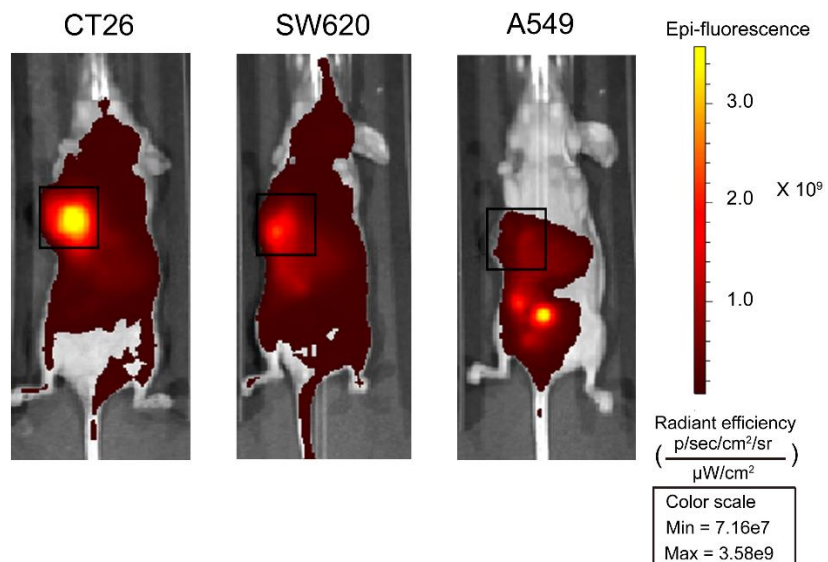

**Figure S17** Investigation of the homing specificity in different mice models. *In vivo* images of mice after tail vein injection of BMS/RA@CC-Liposome at 12 h in CT26, SW620 and A549 tumor-bearing mice, respectively.



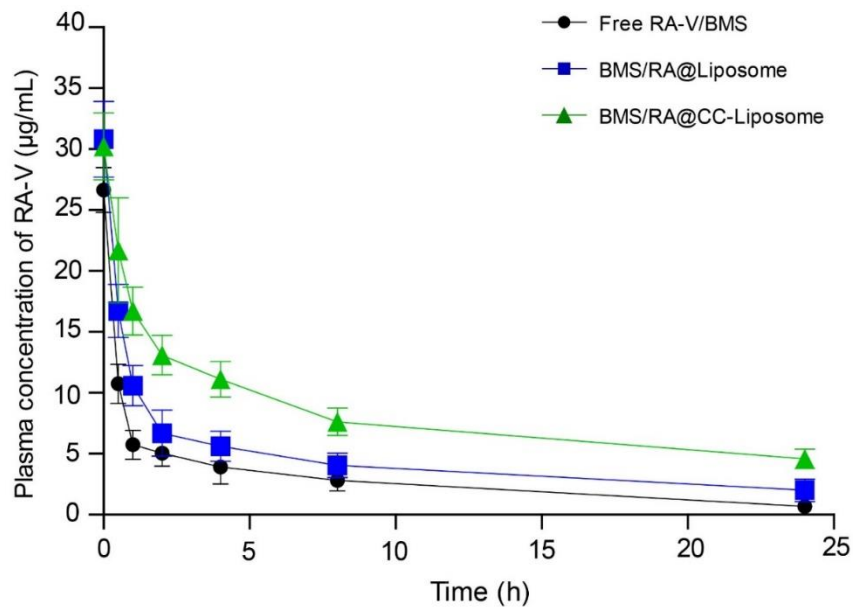

**Figure. S18** Plasma concentration-time curves of RA-V. Determinations of RA-V from Free RA-V/BMS-202, BMS/RA@Liposome and BMS/RA@CC-Liposome after intravenous injection in mice. Data are given as mean  $\pm$ SD ( $n=3$ ).

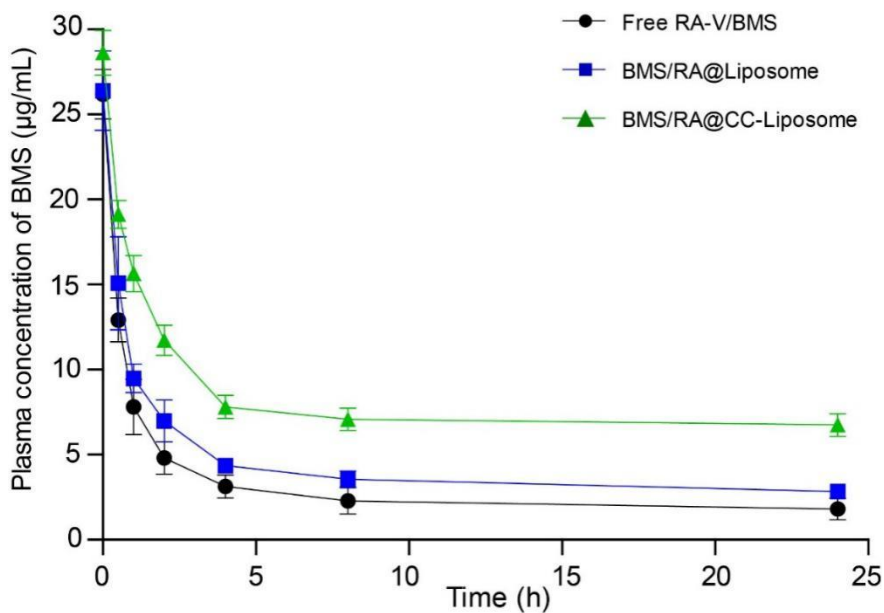

**Figure. S19** Plasma concentration-time curves of BMS. Determinations of BMS from Free RA-V/BMS-202, BMS/RA@Liposome and BMS/RA@CC-Liposome after intravenous injection in mice. Data are given as mean  $\pm$ SD ( $n=3$ ).

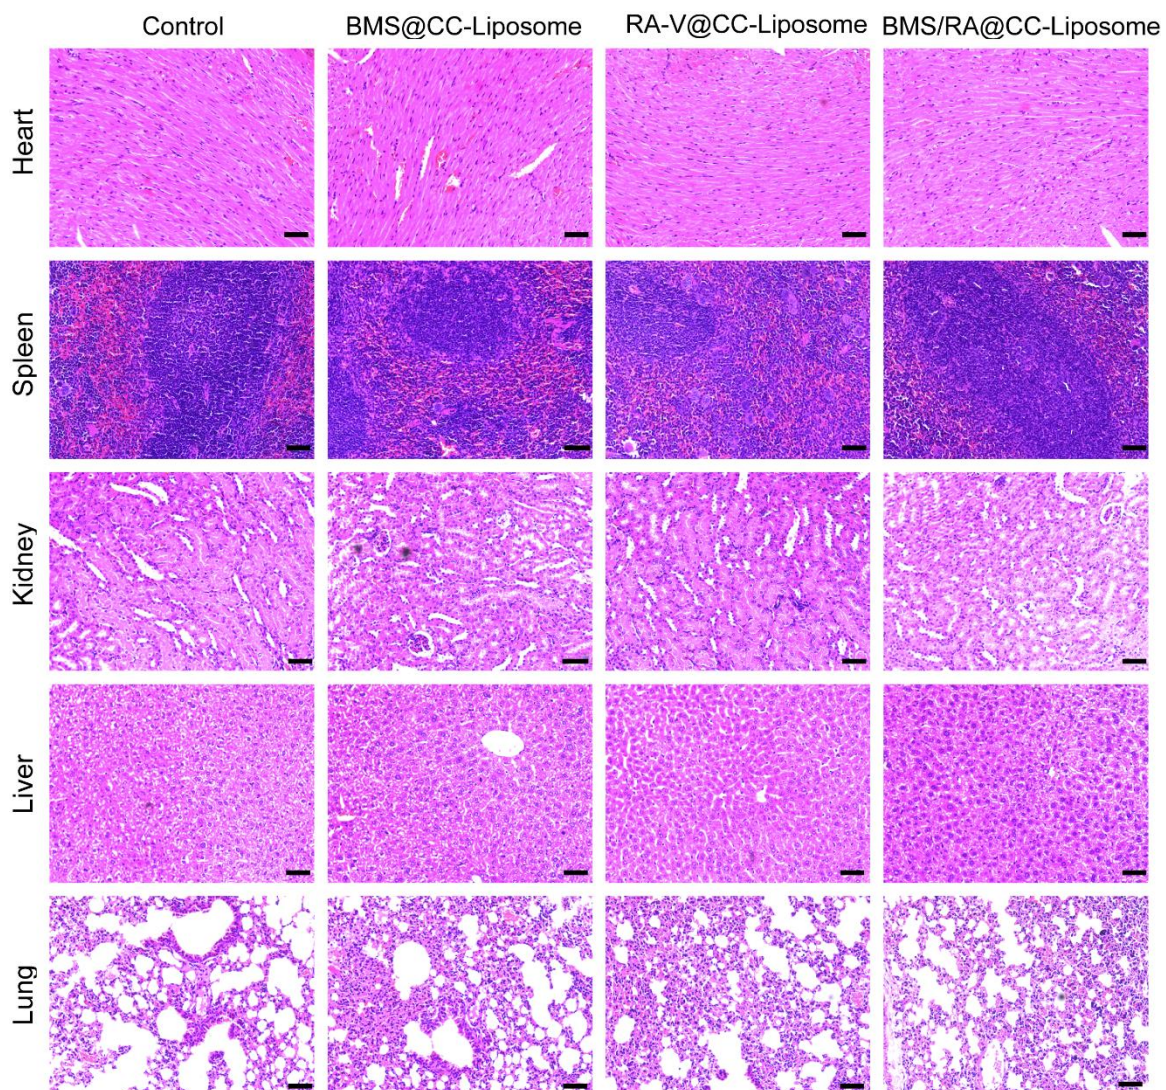

**Figure S20** H&E stained images of major organs for *in vivo* toxicity assay. Histological observation of the organs collected from CT26 tumor-bearing BALB/c mice after different treatments. Scale bar=50  $\mu\text{m}$ .

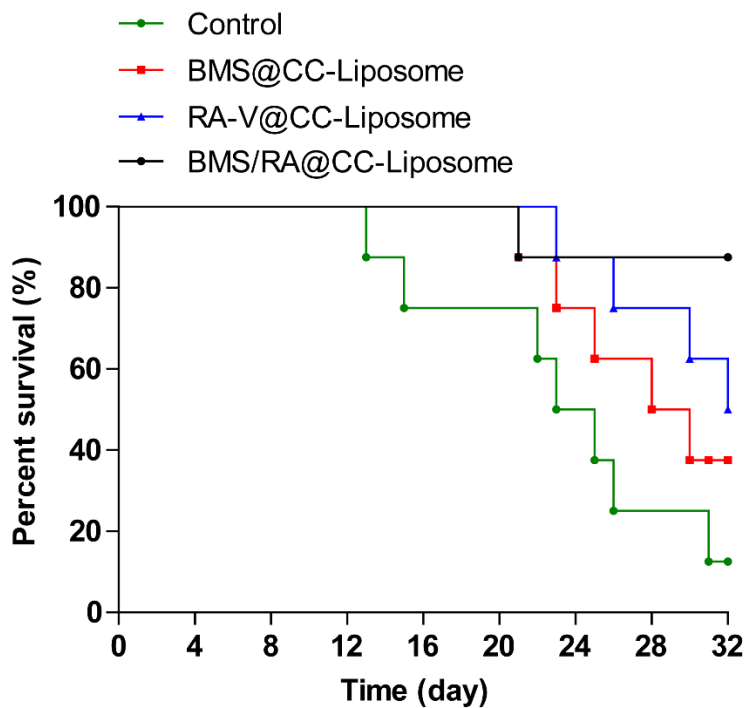

**Figure S21** Survival rates of CT26 tumor-bearing mice during 32 days. CT26 tumor-bearing mice with different treatments indicated were recorded survival rates ( $n=8$ ).
